# Supplementary material
Source: PubMed Central journal article supplement (PMC3182261)
Supplement: NIHMS319626-supplement-1.pdf [file NIHMS319626-supplement-1.pdf]

**AMPK $\alpha$ 2 regulates expression of estrogen related receptor-alpha, a metabolic transcription factor  
related to heart failure development**

Xinli Hu<sup>1,2</sup>, Xin Xu<sup>1</sup>, Zhongbing Lu<sup>1</sup>, Ping Zhang<sup>1,2</sup>, John Fasset<sup>1</sup>, Ying Zhang<sup>3</sup>, Yi Xin<sup>3</sup>,  
Jennifer L. Hall<sup>1,2</sup>, Benoit Viollet<sup>4</sup>, Robert J. Bache<sup>1,2</sup>, Yimin Huang<sup>3</sup>, Yingjie Chen<sup>1,2</sup>,

Running title: **AMPK $\alpha$ 2 regulates estrogen related receptor-alpha**

<sup>1</sup> Cardiovascular Division and <sup>2</sup>Lillehei Heart Institute; University of Minnesota, Minneapolis, MN  
55455, USA

<sup>3</sup> Molecular and Cellular Biology Laboratory, Beijing Anzhen Hospital, Capital Medical University,  
Anzhenli, Chaoyang District, Beijing 100029, China.

<sup>4</sup> Inserm, U1016, Institut Cochin; Cnrs, UMR8104; University Paris Descartes, Paris, France.

*Correspondence:*

*Yingjie Chen, Ph.D.  
University of Minnesota  
Phone: 612-6258970  
Fax: 6126264411  
email: [chenx106@umn.edu](mailto:chenx106@umn.edu)*

*or Yimin Huang, MD  
Beijing Anzhen Hospital  
Phone: 011 86-10-64456652  
Fax: 86-10-64456095  
email: [yiminh0504@yahoo.com.cn](mailto:yiminh0504@yahoo.com.cn)*

## Supplementary Methods

### Western Blots and Quantitative Real-time PCR

Whole cell lysate from heart tissue or cardiomyocytes was resolved on SDS-PAGE gel and transferred to PVDF membrane (Amersham Biosciences). Primary antibodies against AMPK $\alpha$ 1, AMPK $\alpha$ 2, COX-3, and PGC1 $\alpha$  are from Santa Cruz Biotech; antibodies against phos-AMPK<sup>Thr172</sup>, phos-ACC<sup>Ser79</sup>, and cytochrome C are from Cell Signaling; antibody against CPT-1b is from Alpha Diagnostics; antibody against MCAD is from Cayman Chemical; ERR $\alpha$  antibody is from Millipore Bioscience; antibodies against  $\alpha$ -sarcomeric actin and UCP3 are from Sigma. HRP conjugated secondary antibodies were from BioRad Laboratories and Sigma, and were detected by enhanced chemiluminescence (Amersham Biosciences).

For RT and quantitative real-time PCR, total RNA was reverse-transcribed using the High-Capacity cDNA Reverse Transcription Kit from Applied Biosystems. The real-time PCR reaction was performed using the 7900HT Fast Real-Time PCR System from Applied Biosystems. Please see supplementary **Table S2** for primers used for qPCR amplification. Results were normalized to GAPDH levels.

### Cell Culture, Transfection, Reporter Gene Assay and ChIP assay

Neonatal cardiac myocytes were isolated as previously described<sup>1</sup>. Cells were seeded in DMEM with 10% FBS and incubated at 37°C with 5% CO<sub>2</sub> overnight, which allows the cells to attach and spread. The next day, cells were incubated in DMEM (Sigma) with no serum and 0.1mM BrdU for another day before being used for transfection and other studies. Reporter genes were transfected with Lipofectamine 2000 (Invitrogen) as described by the manufacturer. For specific silencing of AMPK $\alpha$ 2 gene expression, non-target control and AMPK $\alpha$ 2 specific siRNA (Ambion) were transfected into neonatal cardiac myocytes using DharmaFECT 3 reagent (Dharmacon). Forty-eight hours after transfection, cells were treated with AICAR or infected with adenovirus for 24 hours. Then, cells were harvested for reporter assay, real-time PCR, Western blot analysis or ChIP assay. ERR $\alpha$  promoter was amplified by PCR using primer pair GGA 5'-GGT ACC ACG ATG GAG GAA AGC GTC AA-3' and 5'-GGA AGA TCT CTG GCT GCT TGT AGG ACA CAA A-3', confirmed by sequencing, then subcloned into pGL3B vector (Promega). Deletions of ERR $\alpha$  promoter was generated using the existing restriction sites as indicated in Figure 7C. LacZ reporter driven by CMV promoter was used as an internal control for transfection, and relative luciferase activity was determined by normalizing luciferase activity to the corresponding LacZ activity. ChIP assay was performed as previously described<sup>1</sup>. Primers 5'-CTC CGC TTC CTC CAG CTG AC-3' and 5'-GTT AGG CCC CAC CCC TTA TG-3' were used to amplify ERR $\alpha$  promoter region with potential Sp1 binding sites.

### Electron microscopy

Heart was first perfused with Millonig's buffer and then with 2.5% Glutaraldehyde solution. LV papillary muscles were then isolated and postfixed in 1% Osmium Tetroxide in distilled water and embedded in polyEmbed 812.

### TUNEL staining and MTT assay

Rat neonatal cardiac myocytes were seeded in 96-well plate and transfected with AMPK $\alpha$ 2 specific siRNA for 48 hours and then infected with GFP or ERR $\alpha$  adenovirus for an additional 24hours. Then cells were treated with 100 $\mu$ M H<sub>2</sub>O<sub>2</sub> for 2 hours. After the treatment, some of the cells were stained with In Situ Cell Death Detection kit (Roche) for apoptotic cells. Others were

incubated in fresh media with 0.5 mg/ml 3-(4,5-dimethyl-2-thiazolyl)-2,5-diphenyl-2H-tetrazolium bromide (MTT, Sigma) for an additional 4 hours and then the converted dye was dissolved in acidic isopropanol (0.04M HCl in absolute isopropanol). The absorbance was measured at 570 nm.

### Statistical Analysis

Results are expressed as mean  $\pm$  standard error of the mean. Data from two groups was compared with unpaired t-test. Tissue samples were obtained from 5-6 mice from each strain. In vitro studies were performed at least three times. For studies of AICAR treated neonatal cardiac myocytes, two-way analysis of variance (ANOVA) was used to test each variable for differences among the treatment groups. Statistical significance was defined as  $p < 0.05$ .

### Reference:

1. Hu X, Xu X, Huang Y, Fassett J, Flagg TP, Zhang Y, Nichols CG, Bache RJ, Chen Y. Disruption of Sarcolemmal ATP-Sensitive Potassium Channel Activity Impairs the Cardiac Response to Systolic Overload. *Circ Res.* 2008;103:1009-1017.

**Table S1.** General information of the human subjects.

| Subject | Diagnosis     | Age | Gender | LV ejection fraction | LVEDD (mm) |
|---------|---------------|-----|--------|----------------------|------------|
| 1       | Donor         | 53  | Female | N/A                  | N/A        |
| 2       | Donor         | 65  | Male   | N/A                  | N/A        |
| 3       | Donor         | 42  | Female | N/A                  | N/A        |
| 4       | Donor         | 48  | Female | N/A                  | N/A        |
| 5       | Donor         | 51  | Male   | N/A                  | N/A        |
| 6       | DCM, mild CAD | 62  | Female | 19%                  | 83         |
| 7       | DCM           | 54  | Female | 15%                  | 83         |
| 8       | DCM, AVR      | 64  | Male   | 18%                  | 73         |
| 9       | DCM           | 30  | Male   | 15%                  | 75         |
| 10      | DCM, SLE      | 34  | Female | 30%                  | 60         |

DCM: Dilated cardiomyopathy; CAD: coronary artery disease; AVR = aortic valve replacement; SLE: systemic lupus erythematosus. N/A: not available.

**Table S2.** Primers used in real-time PCR

| Gene name   | sense                          | antisense                      |
|-------------|--------------------------------|--------------------------------|
| VLCAD       | 5'-ATGCAGTCGGCTCGGATGACCC-3'   | 5'-TGAGAAATTGTGCCTGTTCTTC-3'   |
| VLCAD (rat) | 5'-TCTTGTGCTTCATCAGCTTCG-3'    | 5'-TGAGTCGCAGTGGTGAAGTGG-3'    |
| MCAD        | 5'-CTAACCCAGATCCTAAAGTACCCG-3' | 5'-GGTGTCCGGCTTCCA AATGA-3'    |
| CPT1b       | 5'-GAGTTCTCGATGGCTTTCCG-3'     | 5'-GACAGGACACTGTGTGGGTGAG-3'   |
| CPT1b(rat)  | 5'-GCAGTTCAGAGAATCCTCG-3'      | 5'-GCCACTCTACCCTCCTCCTG-3'     |
| COX-1       | 5'-TGAAACCCAGCCATAAC-3'        | 5'-CCAGCGGGATCAAAGAAAG-3'      |
| COX-3       | 5'-CATCGTCTCGGAAGTATTTTT-3'    | 5'-ATTAGTAGGGCTTGATTTATGTGG-3' |

---

ERR $\alpha$

5'-TGGAGCGGGAGGAGTACGTC-3'

5'-CAGCCTCAGCATCTTCAATGTG-3'

---

Primers were designed according to mouse cDNA sequences if not specifically labeled.

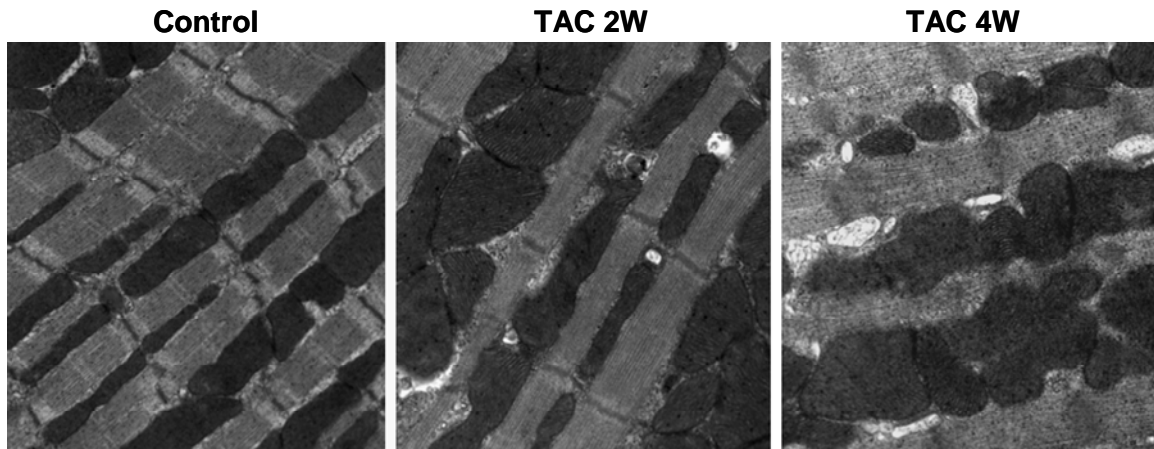

**Figure S1.** Myocardial mitochondria morphology in mice after TAC. Wild type mice were subjected to TAC for 2 or 4 weeks, which caused gradual mitochondrial damage.

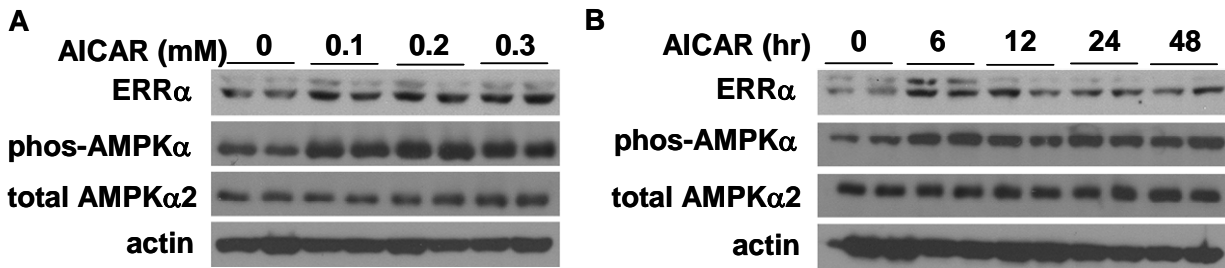

**Figure S2.** ERR $\alpha$  expression in response to different dose and time course of AICAR treatment. Rat neonatal cardiac myocytes were treated with AICAR at indicated doses and time course. The protein levels of ERR $\alpha$  was determined by Western blot.

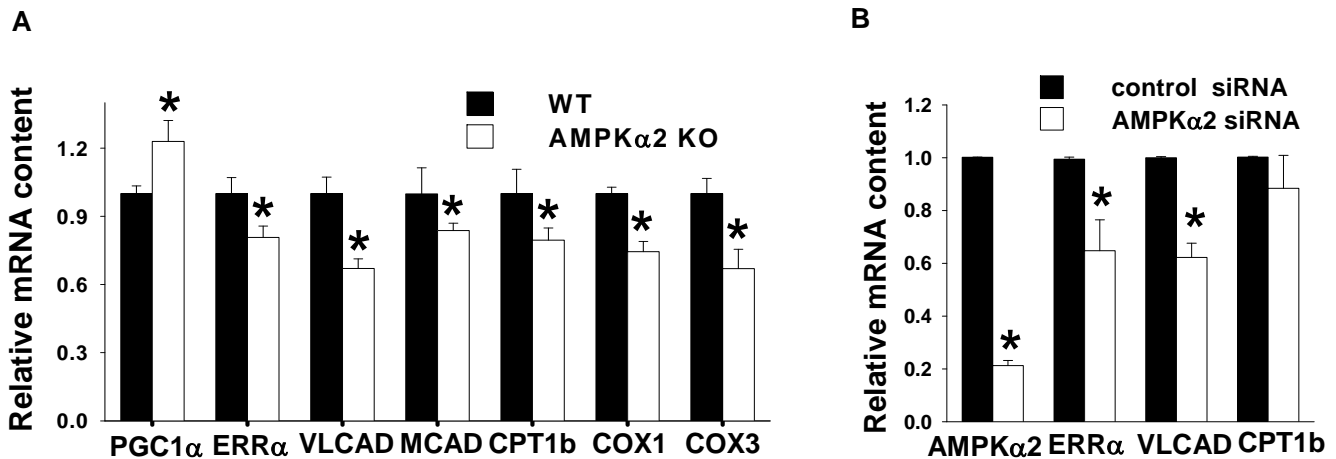

**Figure S3.** AMPK $\alpha$ 2 regulates ERR $\alpha$  expression at the transcriptional level. The mRNA levels of ERR $\alpha$  and energy metabolism related genes were determined by real-time quantitative PCR. In AMPK $\alpha$ 2 deficient mice (A), or rat neonatal cardiac myocytes treated with siRNA for AMPK $\alpha$ 2 (B), the mRNA levels of ERR $\alpha$ , VLCAD and CPT1b were significantly decreased. \*  $p < 0.05$  as compared with wild type controls (A) or as compared with control siRNA transfected cells (B).

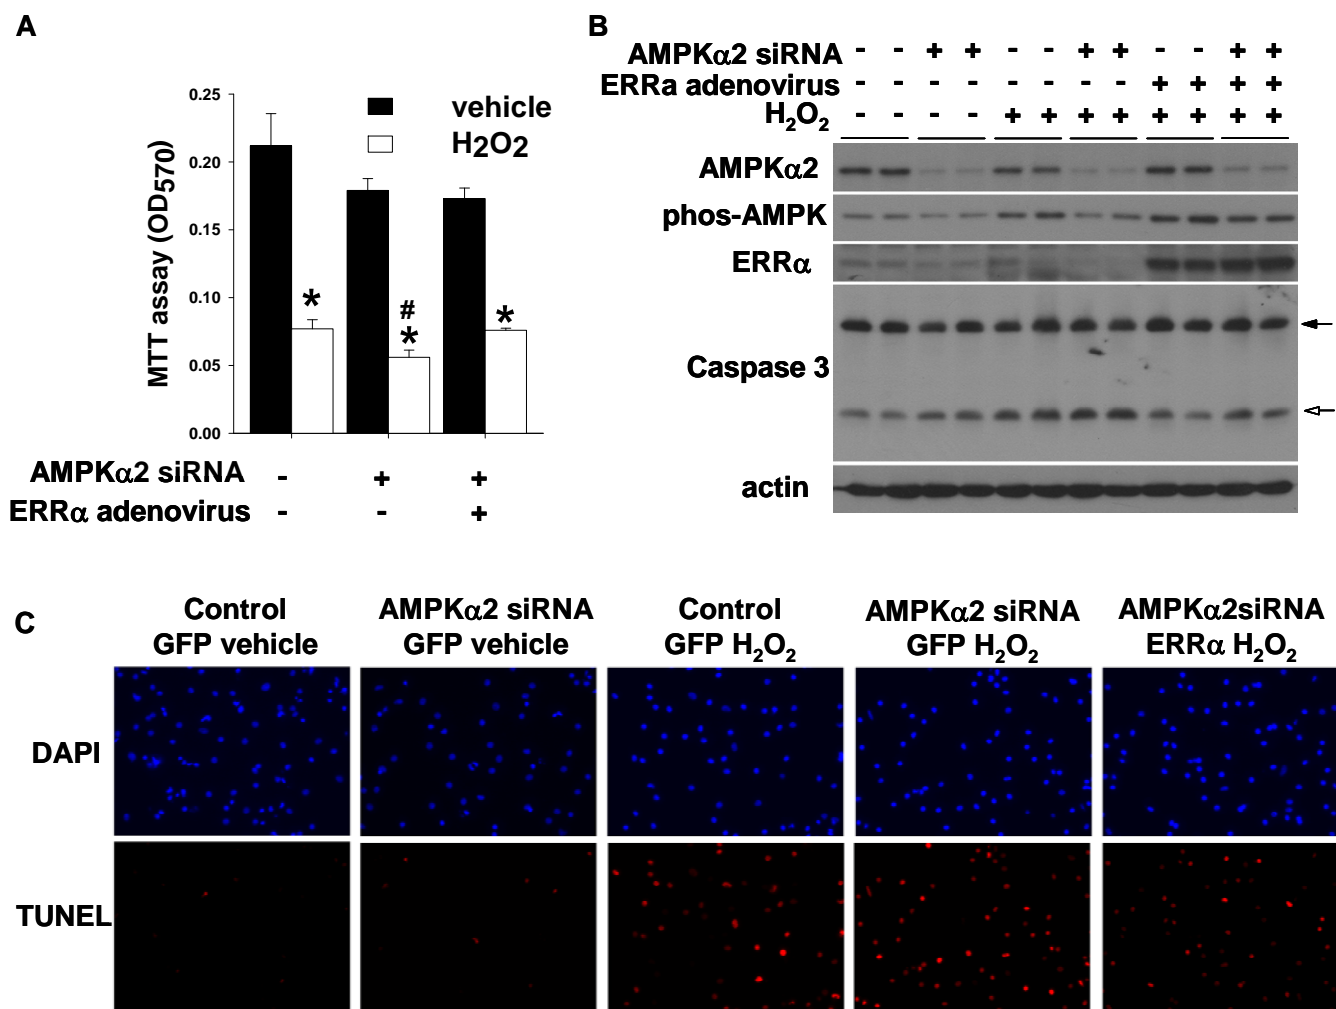

**Figure S4.** Effects of AMPK and ERR $\alpha$  overexpression on oxidative stress damage in rat neonatal cardiac myocytes. Rat neonatal cardiac myocytes were treated with H<sub>2</sub>O<sub>2</sub> or vehicle. Inhibition of AMPK $\alpha$ 2 expression by specific siRNA decreased cell viability (A), increased the level of cleaved caspase 3 (B) and the number of TUNEL positive cells (C). The enhanced oxidative stress damage caused by AMPK $\alpha$ 2 repression could be partially rescued by ERR $\alpha$  overexpression.
